# Supplementary material
Source: PubMed Central journal article supplement (PMC3349884)

Suppl. Figure 1.

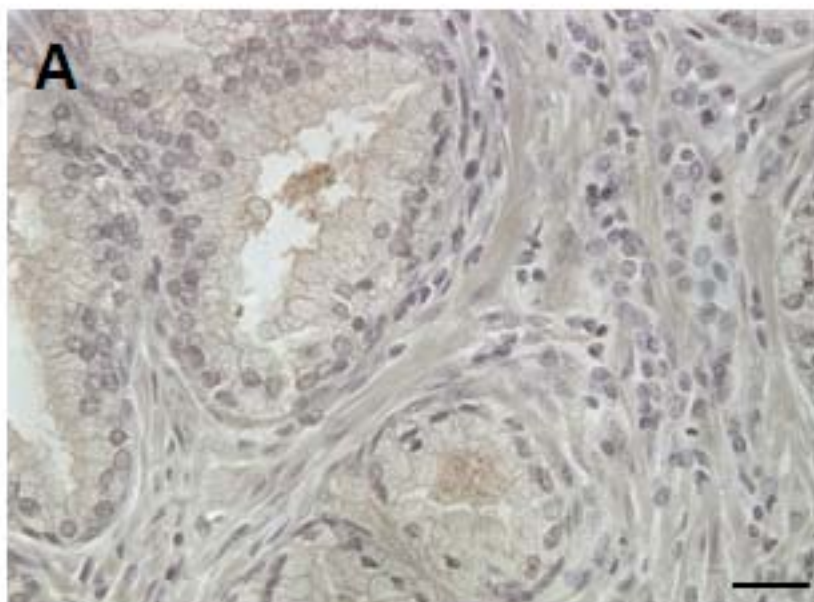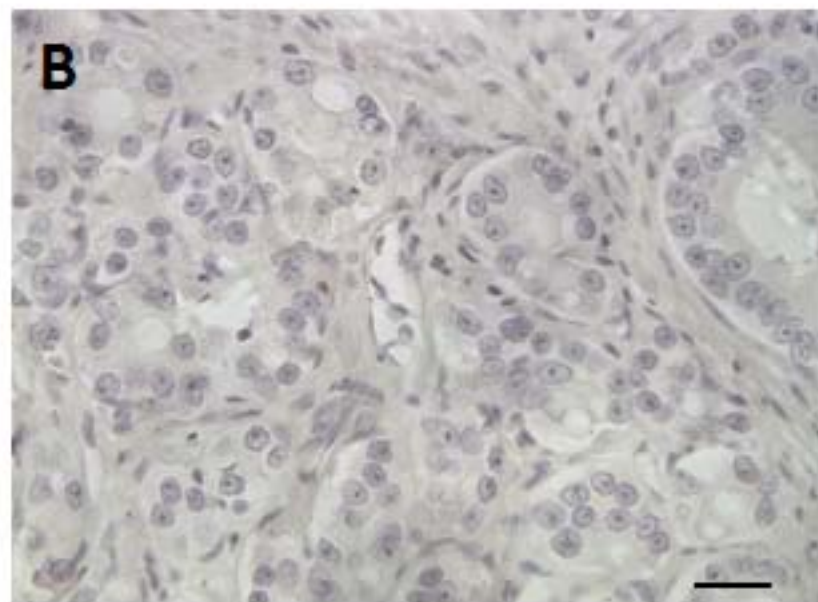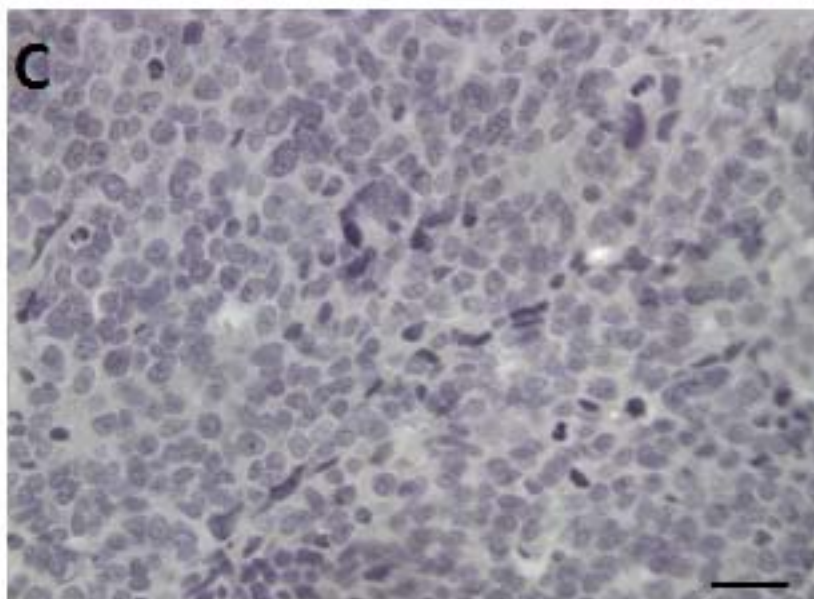

Supplement: mmc1.pdf [file mmc1.pdf]

Suppl. Figure 2

Relative expression level  
(normalized to control gene)

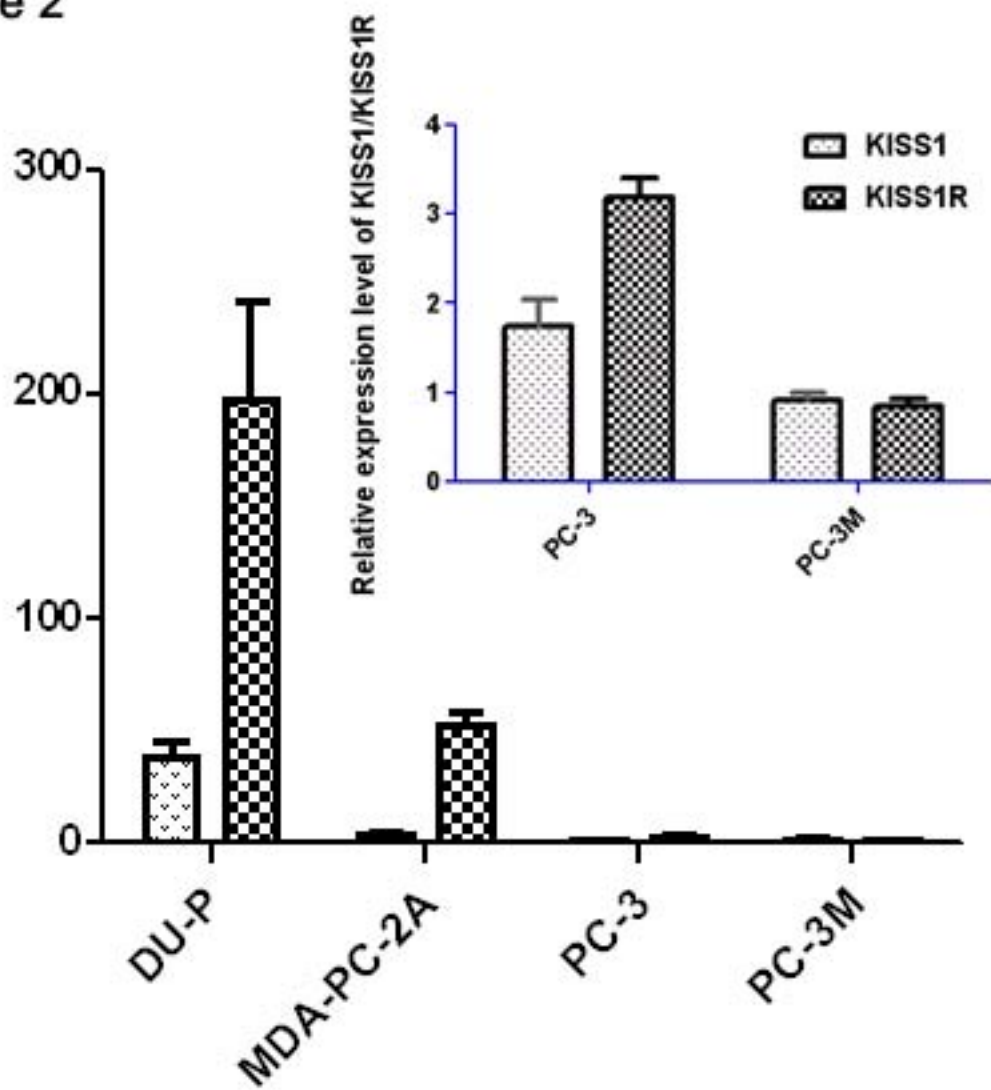

Supplement: mmc2.pdf [file mmc2.pdf]

Suppl. Figure 3

A

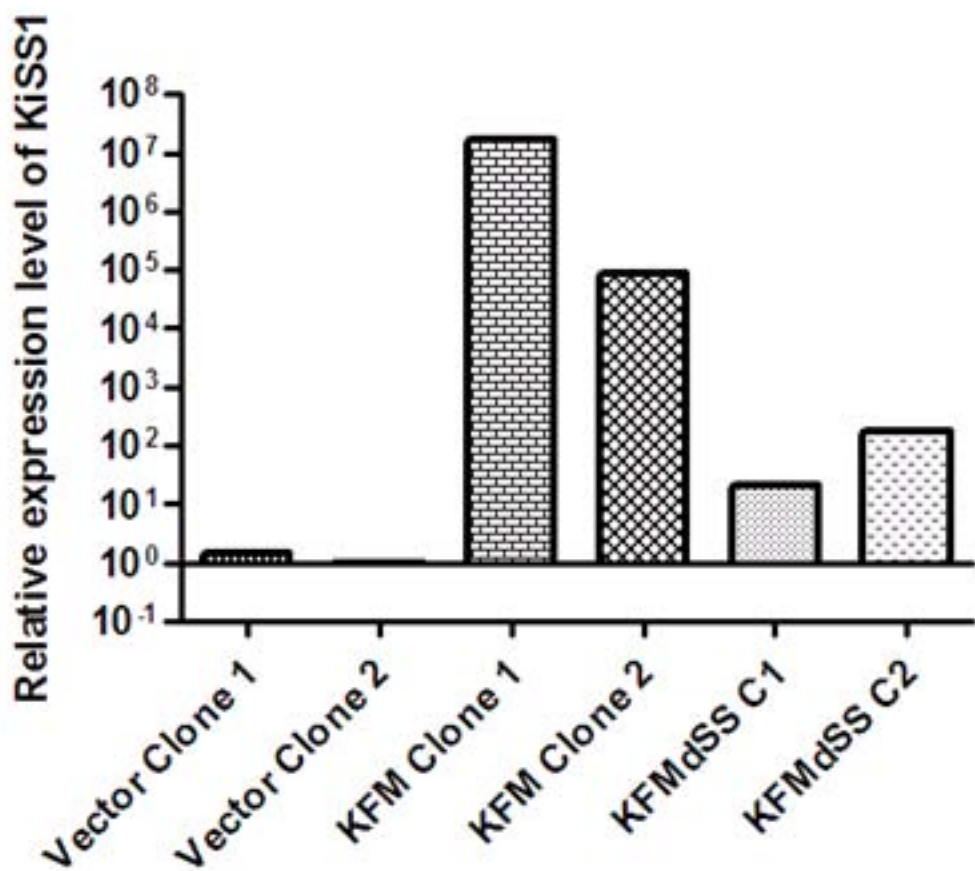

B

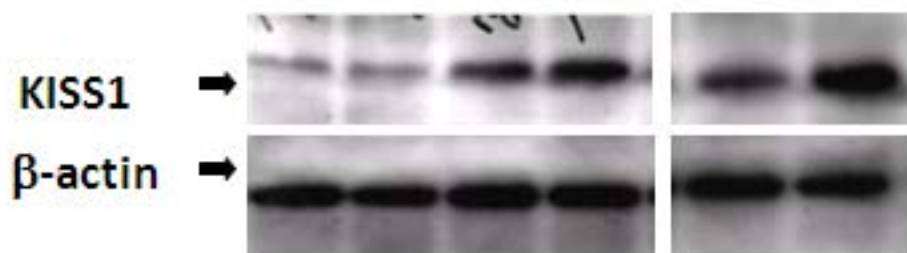

Supplement: mmc3.pdf [file mmc3.pdf]
